# Supplementary material
Source: PubMed Central journal article supplement (PMC3478405)
Supplement: NIHMS407751-supplement-1_si_001.pdf [file NIHMS407751-supplement-1_si_001.pdf]

# ALiBERO: Evolving a team of complementary pocket conformations rather than a single leader

*Manuel Rueda<sup>1</sup>, Max Totrov<sup>2</sup> and Ruben Abagyan<sup>1</sup>*

**AUTHOR ADDRESS:**

[1] Skaggs School of Pharmacy and Pharmaceutical Sciences, University of California, San Diego, La Jolla, CA 92093, USA.

[2] Molsoft L.L.C., 11199 Sorrento Valley Road, S209, San Diego, CA 92121, USA.

AUTHOR EMAIL ADDRESS: [rabagyan@ucsd.edu](mailto:rabagyan@ucsd.edu)

## **SUPPORTING INFORMATION AVAILABLE**

Supporting Tables S1 and S2 including all compounds used in the training with ER $\alpha$  ( $Tr_{1:1}$ ) and Supporting Figure S3. This information is available free of charge via the Internet at <http://pubs.acs.org>.

**Supporting Table S1.** List of the 31 active ligands (cognate ligands from the 31 PDB ID entries) used as training set ( $Tr_{1,i}$ ) with the ER $\alpha$  protein.

|                                                                                                                                                                                                                                     |                                                                                                                                                                                                                                   |                                                                                                                                                                                                                                  |                                                                                                                                                                                                                                   |                                                                                                                                                                                                                             |
|-------------------------------------------------------------------------------------------------------------------------------------------------------------------------------------------------------------------------------------|-----------------------------------------------------------------------------------------------------------------------------------------------------------------------------------------------------------------------------------|----------------------------------------------------------------------------------------------------------------------------------------------------------------------------------------------------------------------------------|-----------------------------------------------------------------------------------------------------------------------------------------------------------------------------------------------------------------------------------|-----------------------------------------------------------------------------------------------------------------------------------------------------------------------------------------------------------------------------|
| 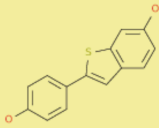 <p>Molecule Nam 1gwq<br/>Ligand_Name aztw<br/>comment raloxifene core</p>                                                                         |  <p>Molecule Nam 1x7r<br/>Ligand_Name agen<br/>comment genistein</p>                                                                             |  <p>Molecule Nam 1x7e<br/>Ligand_Name b244<br/>comment [5-hydroxy-2-(4-hydroxyphenyl)-2H-benzofuran]</p>                                        |  <p>Molecule Nam 3dt3<br/>Ligand_Name a369<br/>comment 5-(4-hydroxyphenoxy)-2,3-bis(4-chlorophenoxy)benzofuran</p>                             |  <p>Molecule Nam 2iok<br/>Ligand_Name aiok<br/>comment n-[(1r)-3-(4-hydroxyphenyl)propyl]-1H-benzotriazol-4-amine</p>                    |
|  <p>Molecule Nam 2r6y<br/>Ligand_Name allc<br/>comment [6-hydroxy-2-(4-hydroxyphenyl)-2H-benzofuran-3-yl]pyrrolidine</p>                           |  <p>Molecule Nam 1i2i<br/>Ligand_Name betc<br/>comment (r,r)-5,11-cis-diethyl-5,11-dihydro-2H-benzofuran</p>                                     |  <p>Molecule Nam 3erd<br/>Ligand_Name ades<br/>comment diethylstilbestrol</p>                                                                   |  <p>Molecule Nam 2g5o<br/>Ligand_Name bdrq<br/>comment (9alpha,13beta,17beta)-9,13,17-trimethyl-10,13,17-trihydro-2H-benzofuran</p>            |  <p>Molecule Nam 1r5k<br/>Ligand_Name bgw5<br/>comment (2e)-3-[4-[(1e)-1,2-dihydro-2H-benzofuran-3-yl]phenyl]acrylonitrile</p>           |
|  <p>Molecule Nam 2bj4<br/>Ligand_Name boht<br/>comment 4-hydroxytamoxifen</p>                                                                      |  <p>Molecule Nam 3ert<br/>Ligand_Name aoht<br/>comment 4-hydroxytamoxifen</p>                                                                    |  <p>Molecule Nam 1zky<br/>Ligand_Name a689<br/>comment 4-[(1s,2s,5s)-5-(hydroxy(phenylamino)oxy)phenyl]-1H-indazole</p>                         |  <p>Molecule Nam 2b1v<br/>Ligand_Name b458<br/>comment 4-[(1s,2s,5s)-5-(hydroxy(phenylamino)oxy)phenyl]-1H-indazole</p>                        |  <p>Molecule Nam 2g44<br/>Ligand_Name bt3o<br/>comment 4-[(1s,2r,5s)-4,4,8-trimethyl-10,13,17-trihydro-2H-benzofuran-3-yl]phenyl</p>     |
|  <p>Molecule Nam 2fai<br/>Ligand_Name b459<br/>comment 4-[(1s,2s,5s,9r)-5-(hydroxy(phenylamino)oxy)phenyl]-1H-indazole</p>                        |  <p>Molecule Nam 2i0j<br/>Ligand_Name di0g<br/>comment (3as,4r,9br)-4-(4-hydroxyphenyl)-10,13,17-trimethyl-10,13,17-trihydro-2H-benzofuran</p>  |  <p>Molecule Nam 2pog<br/>Ligand_Name awst<br/>comment (3as,4r,9br)-4-(4-hydroxyphenyl)-10,13,17-trimethyl-10,13,17-trihydro-2H-benzofuran</p> |  <p>Molecule Nam 2qe4<br/>Ligand_Name bj3<br/>comment (3as,4r,9br)-4-(4-hydroxyphenyl)-10,13,17-trimethyl-10,13,17-trihydro-2H-benzofuran</p> |  <p>Molecule Nam 2q70<br/>Ligand_Name adc8<br/>comment (3as,4r,9br)-2,2-difluoro-10,13,17-trimethyl-10,13,17-trihydro-2H-benzofuran</p> |
|  <p>Molecule Nam 2qh6<br/>Ligand_Name bode<br/>comment diethyl (1r,2s,3r,4s)-5,6-dimethyl-10,13,17-trimethyl-10,13,17-trihydro-2H-benzofuran</p> |  <p>Molecule Nam 2qr9<br/>Ligand_Name ahz3<br/>comment dimethyl (1r,4s)-5,6-bis(methyl)-10,13,17-trimethyl-10,13,17-trihydro-2H-benzofuran</p> |  <p>Molecule Nam 2qa6<br/>Ligand_Name bkn2<br/>comment 4-(6-hydroxy-1H-indazol-3-yl)phenyl</p>                                                |  <p>Molecule Nam 2qzo<br/>Ligand_Name bkn1<br/>comment 4-[1-allyl-7-(trifluoromethyl)-1H-benzotriazol-4-yl]phenyl</p>                        |  <p>Molecule Nam 3osa<br/>Ligand_Name akn3<br/>comment 4-[1-(3-methylbut-2-en-1-yl)-1H-benzotriazol-4-yl]phenyl</p>                    |
|  <p>Molecule Nam 3os8<br/>Ligand_Name akn0<br/>comment 4-[1-benzyl-7-(trifluoromethyl)-1H-benzotriazol-4-yl]phenyl</p>                           |  <p>Molecule Nam 3os8<br/>Ligand_Name dkn0<br/>comment 4-[1-benzyl-7-(trifluoromethyl)-1H-benzotriazol-4-yl]phenyl</p>                         |  <p>Molecule Nam 2qab<br/>Ligand_Name ael1<br/>comment 3-ethyl-2-(4-hydroxyphenyl)-1H-indazole</p>                                            |  <p>Molecule Nam 2qgw<br/>Ligand_Name aees<br/>comment 3-chloro-2-(4-hydroxyphenyl)-1H-indazole</p>                                          |  <p>Molecule Nam 2qse<br/>Ligand_Name b1hp<br/>comment 4-(2-amino-1-methyl-1H-benzotriazol-4-yl)phenyl</p>                             |
|  <p>Molecule Nam 2qxm<br/>Ligand_Name bpiq<br/>comment 2-amino-1-methyl-6-phenyl-1H-benzotriazol-4-amine</p>                                     |                                                                                                                                                                                                                                   |                                                                                                                                                                                                                                  |                                                                                                                                                                                                                                   |                                                                                                                                                                                                                             |

**Supporting Table S2.** List of the 31 decoy compounds used as training set ( $Tr_{1:l}$ ) with the ER $\alpha$  protein. The decoys were taken from Shoichet's directory of useful decoys (DUD) dataset.<sup>1</sup> The 31 ligands came from random selection among the 418 centroid clusters from all 4018 decoys in the entries "ER\_agonist - Estrogen receptor agonist" and "ER\_antagonist - Estrogen receptor antagonist").

|                                                                                                    |                                                                                                  |                                                                                                   |                                                                                                   |                                                                                                      |
|----------------------------------------------------------------------------------------------------|--------------------------------------------------------------------------------------------------|---------------------------------------------------------------------------------------------------|---------------------------------------------------------------------------------------------------|------------------------------------------------------------------------------------------------------|
| 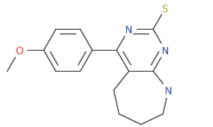<br>C15H17N3O5    | <br>C13H16N4O2  | <br>C18H23NO2    | <br>C15H17NO25  | <br>C29H27NO3     |
| <br>C16H18ClN2O   | <br>C15H15N4O3  | <br>C18H18O3     | <br>C14H17N3O2  | <br>C17H19N3O     |
| <br>C18H21N3      | <br>C14H21N3S   | <br>C16H15N3O2   | <br>C15H15N4O   | <br>C27H34N5      |
| <br>C16H20N2O25  | <br>C16H17NO25 | <br>C17H15N3O   | <br>C14H13ClN4 | <br>C15H21N2O25  |
| <br>C15H23O25   | <br>C13H16N4S | <br>C27H30N2O3 | <br>C18H17N3S | <br>C25H23N3O3S |
| <br>C17H16N2O2  | <br>C17H19N3  | <br>C16H21NO3  | <br>C29H33N2O | <br>C14H15FN4S  |
| <br>C14H17N2O3S |                                                                                                  |                                                                                                   |                                                                                                   |                                                                                                      |

**Supporting Figure S3.** Plot showing the poor correlation between the x-ray resolution and screening performance for the 31 PDB ID entries present in the ESR1\_HUMAN\_300\_551 pocketome entry.

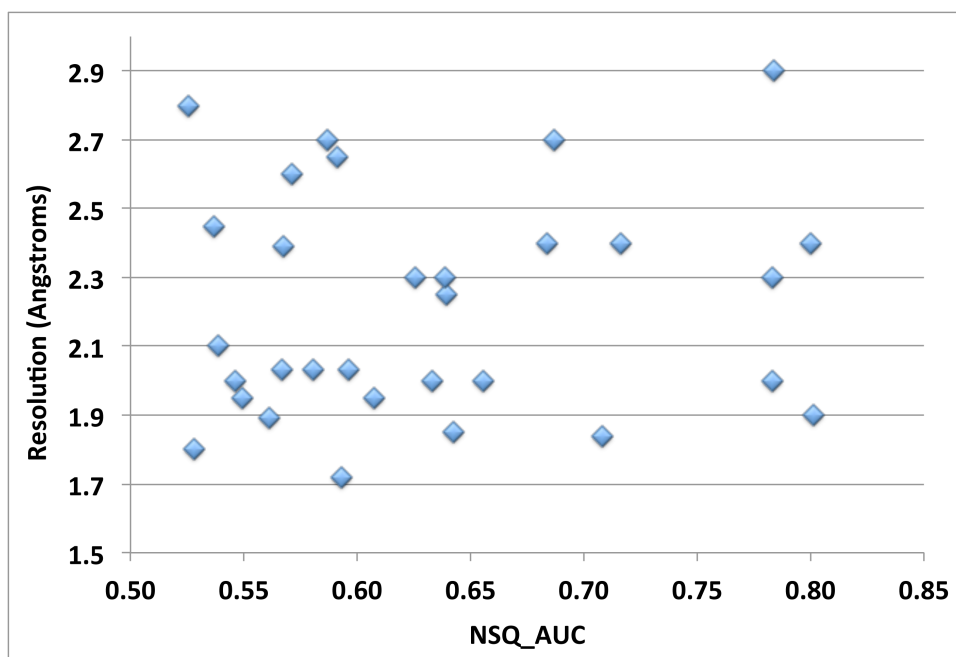

## REFERENCES

1. Huang, N.; Shoichet, B. K.; Irwin, J. J., Benchmarking sets for molecular docking. *J. Med. Chem.* **2006**, 49, (23), 6789-801.
